# Supplementary material for: Analyses of methyltransferases across the pathogenicity spectrum of different mycobacterial species point to an extremophile connection
Source: Royal Society of Chemistry journal article supplement (doi:10.1039/c5mb00810g), 2016-03-07

### Supplementary Table 3: Phylogenetic analyses of distinct methyltransferases of *M.tb* H<sub>37</sub>Rv

#### Rv1509

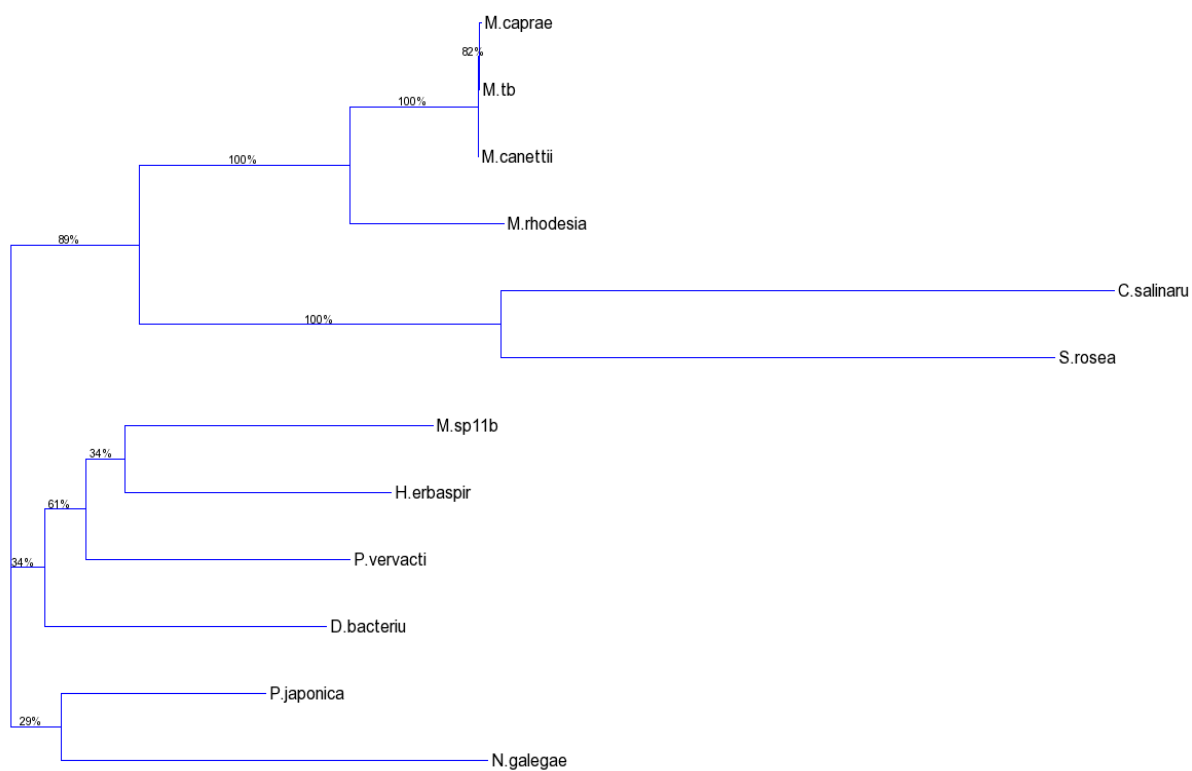

# Rv1515

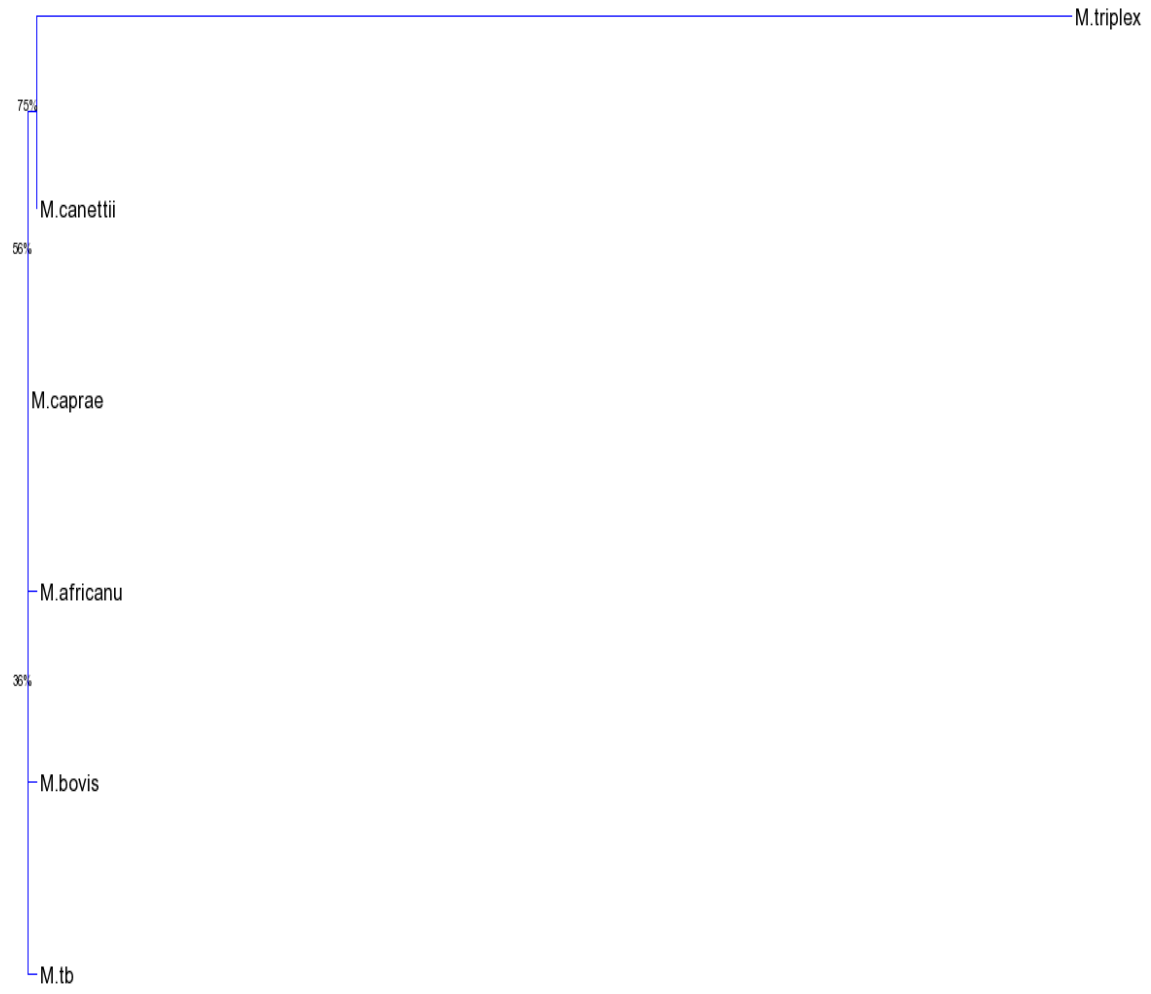

# Rv2954c

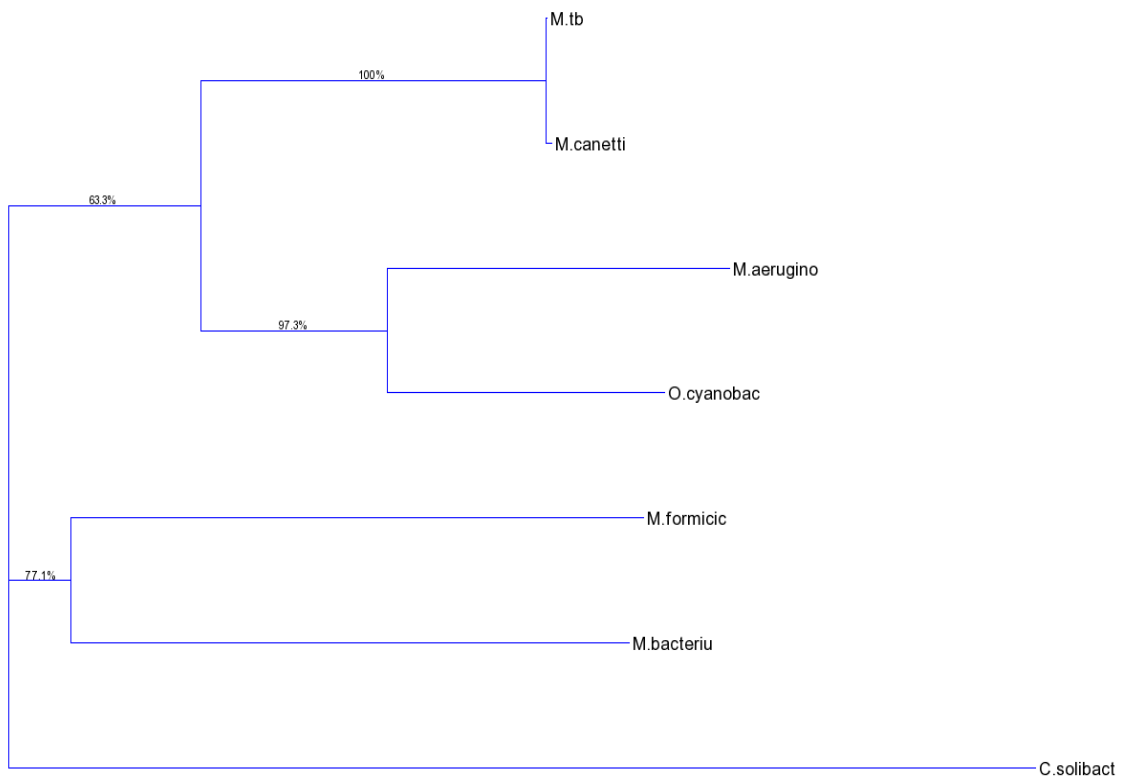

# Rv2955

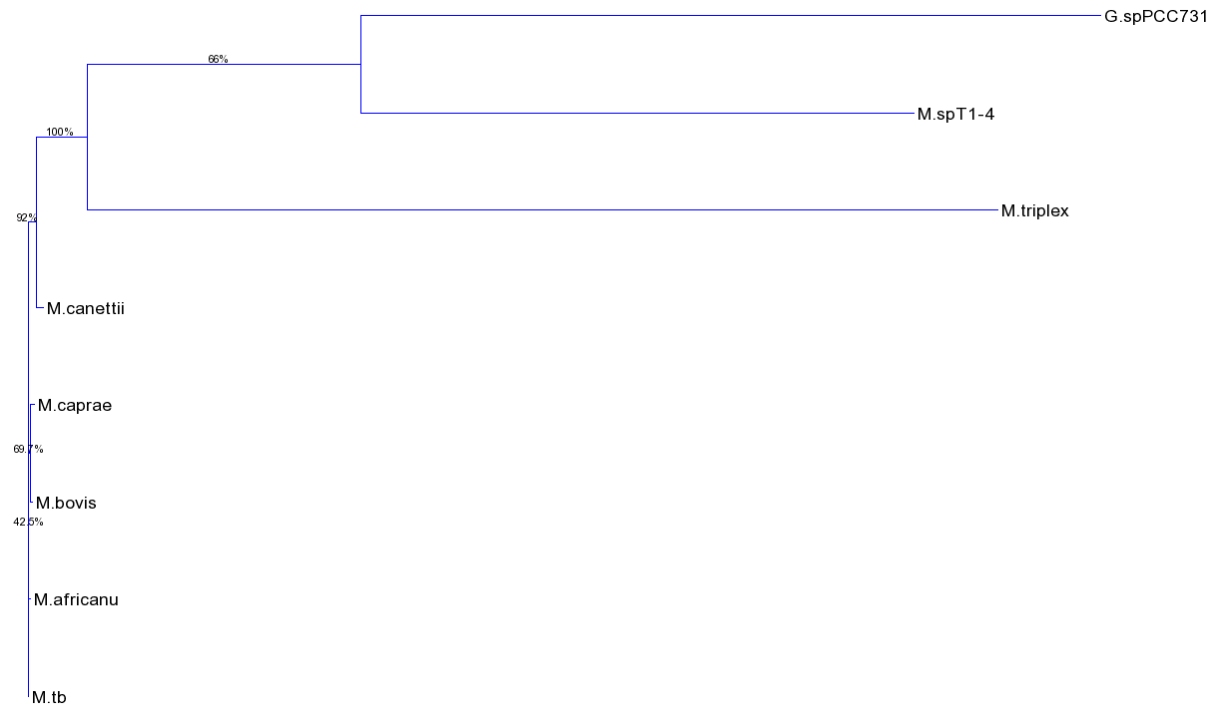

# Rv1498c

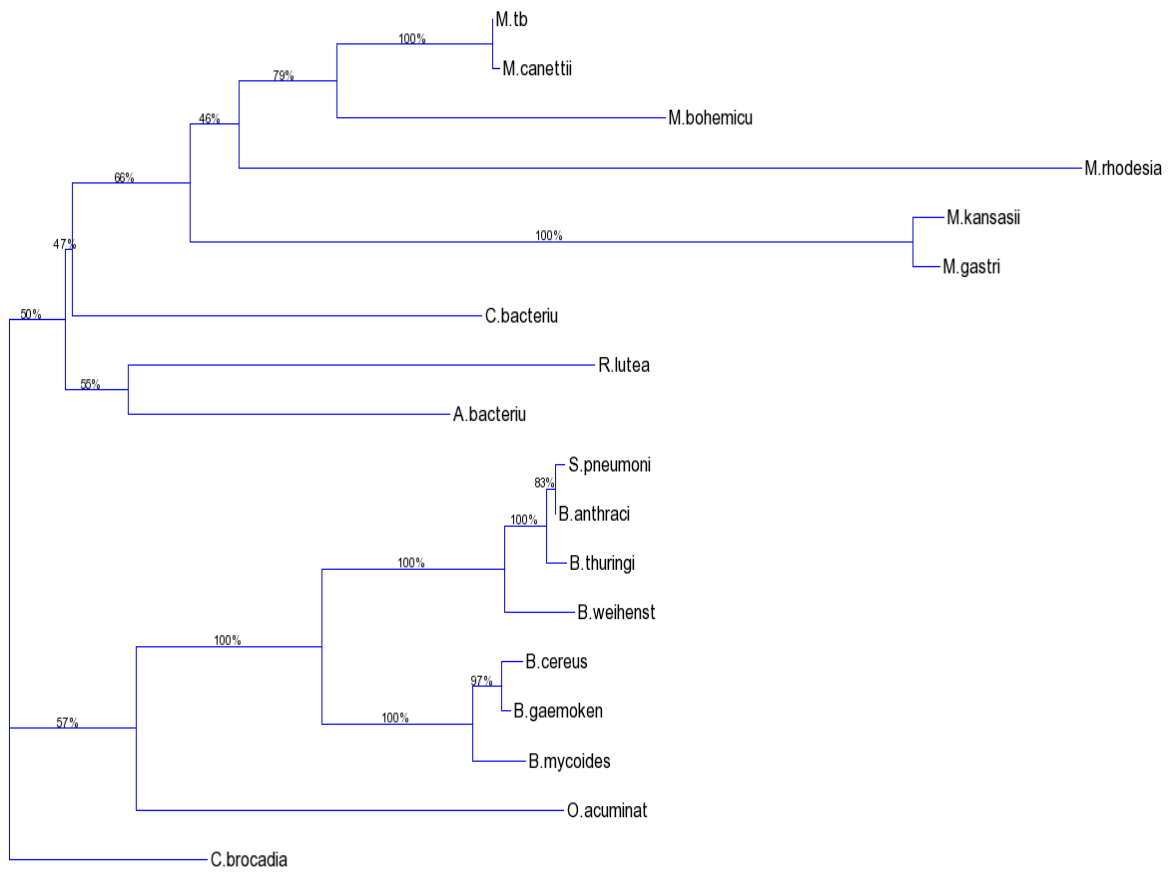

Rv0329c

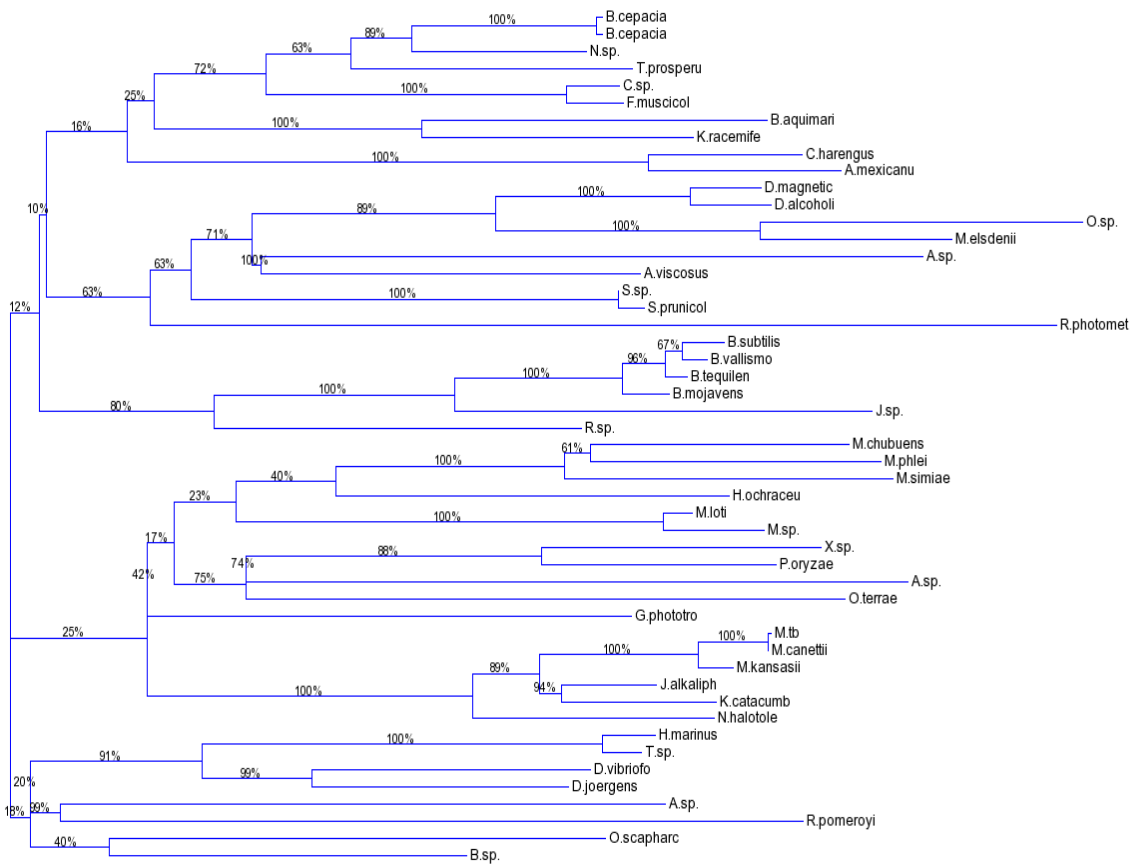

**Rv3120**

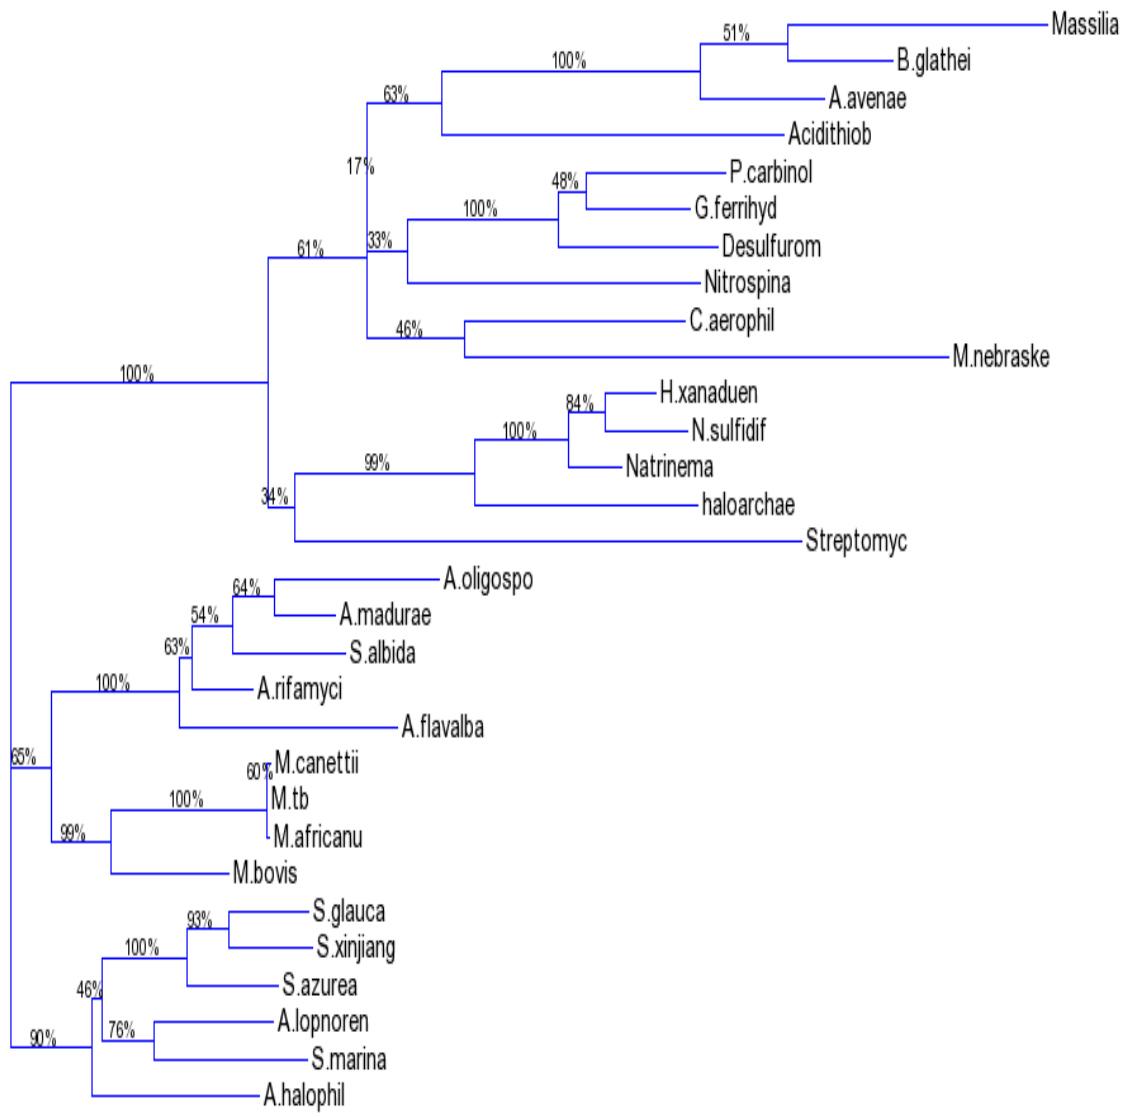

**Rv2990**

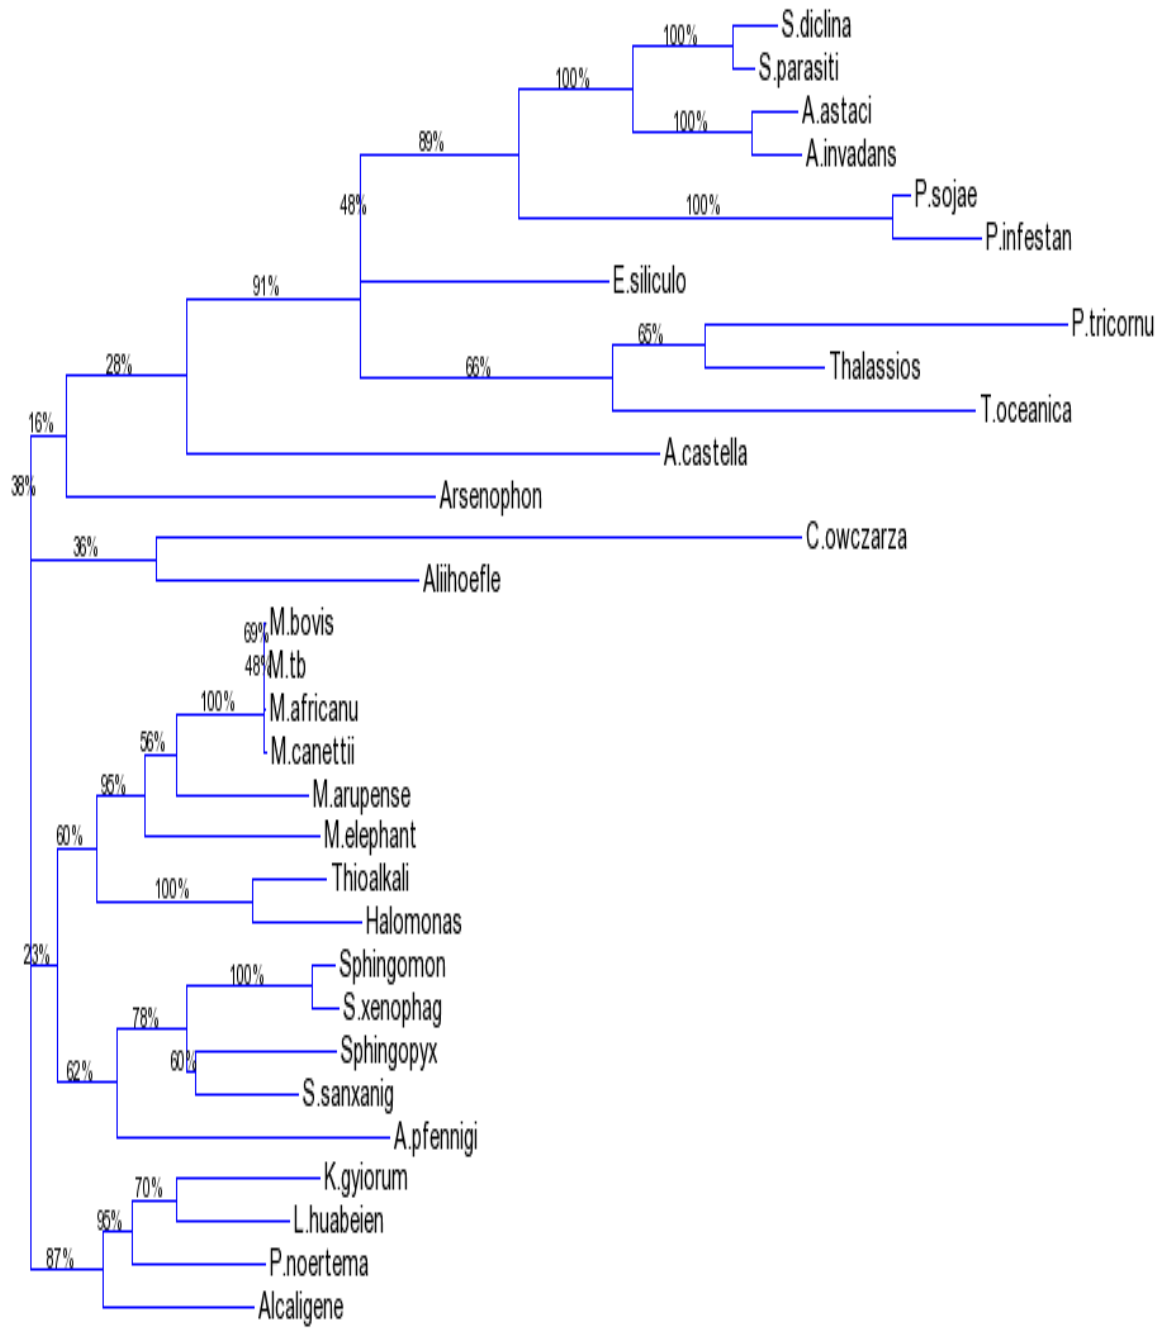



Rv2003c

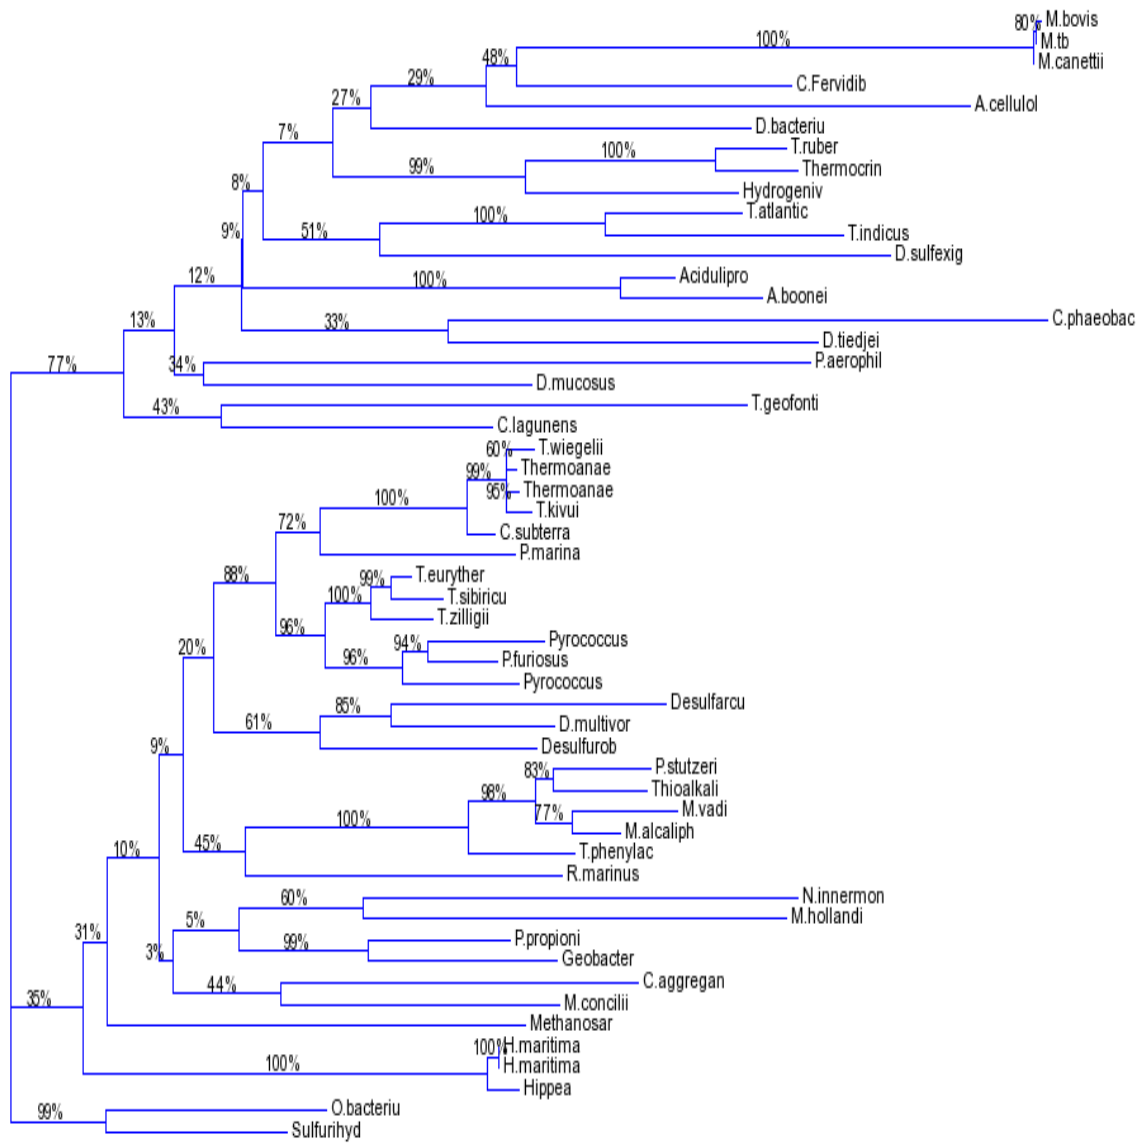

**Rv3729**

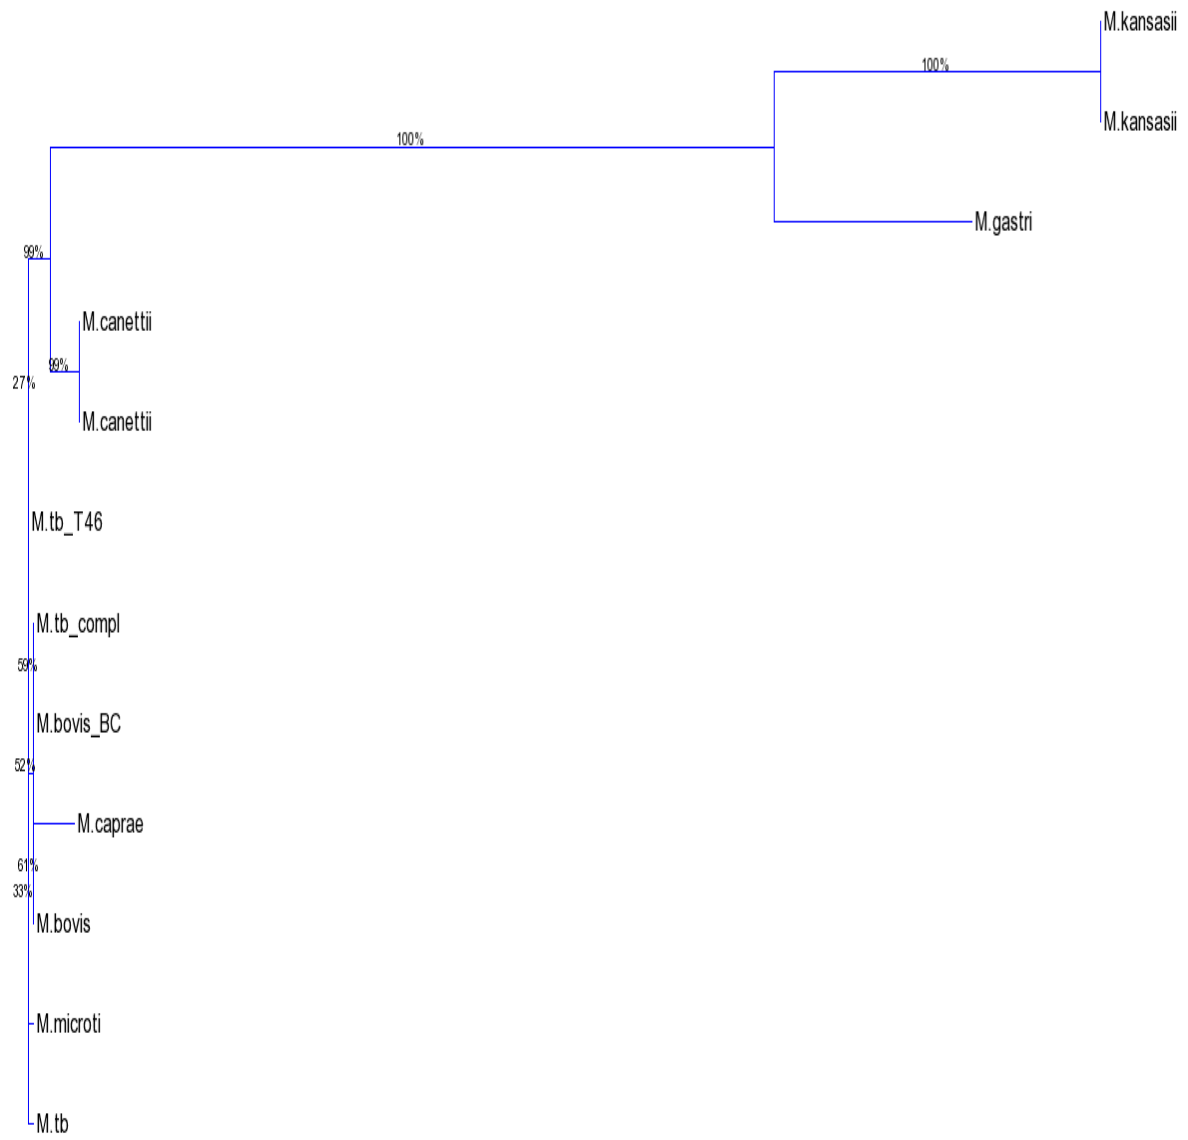

# Rv0725c

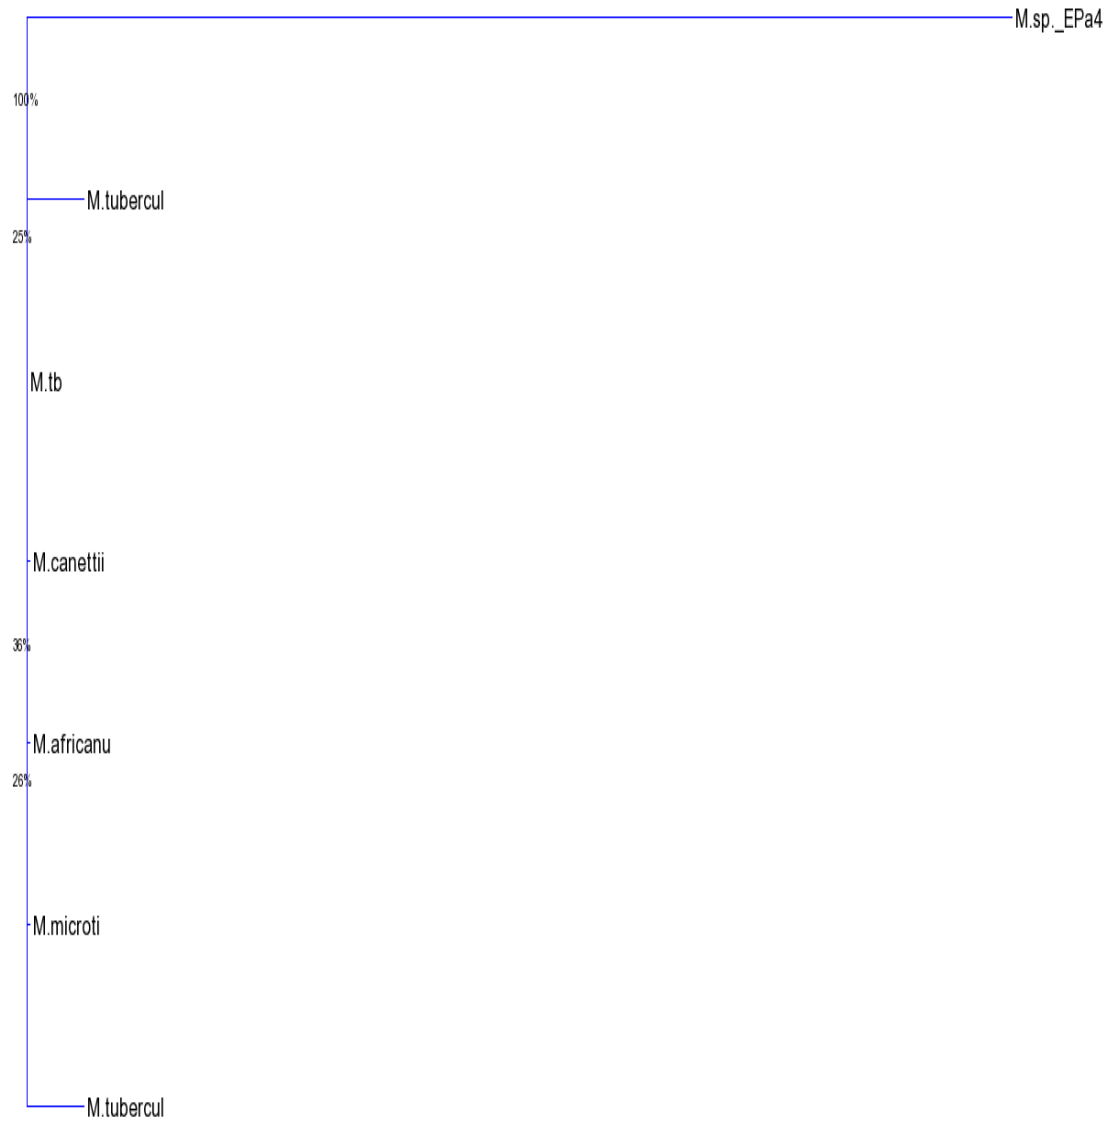

# Rv0326

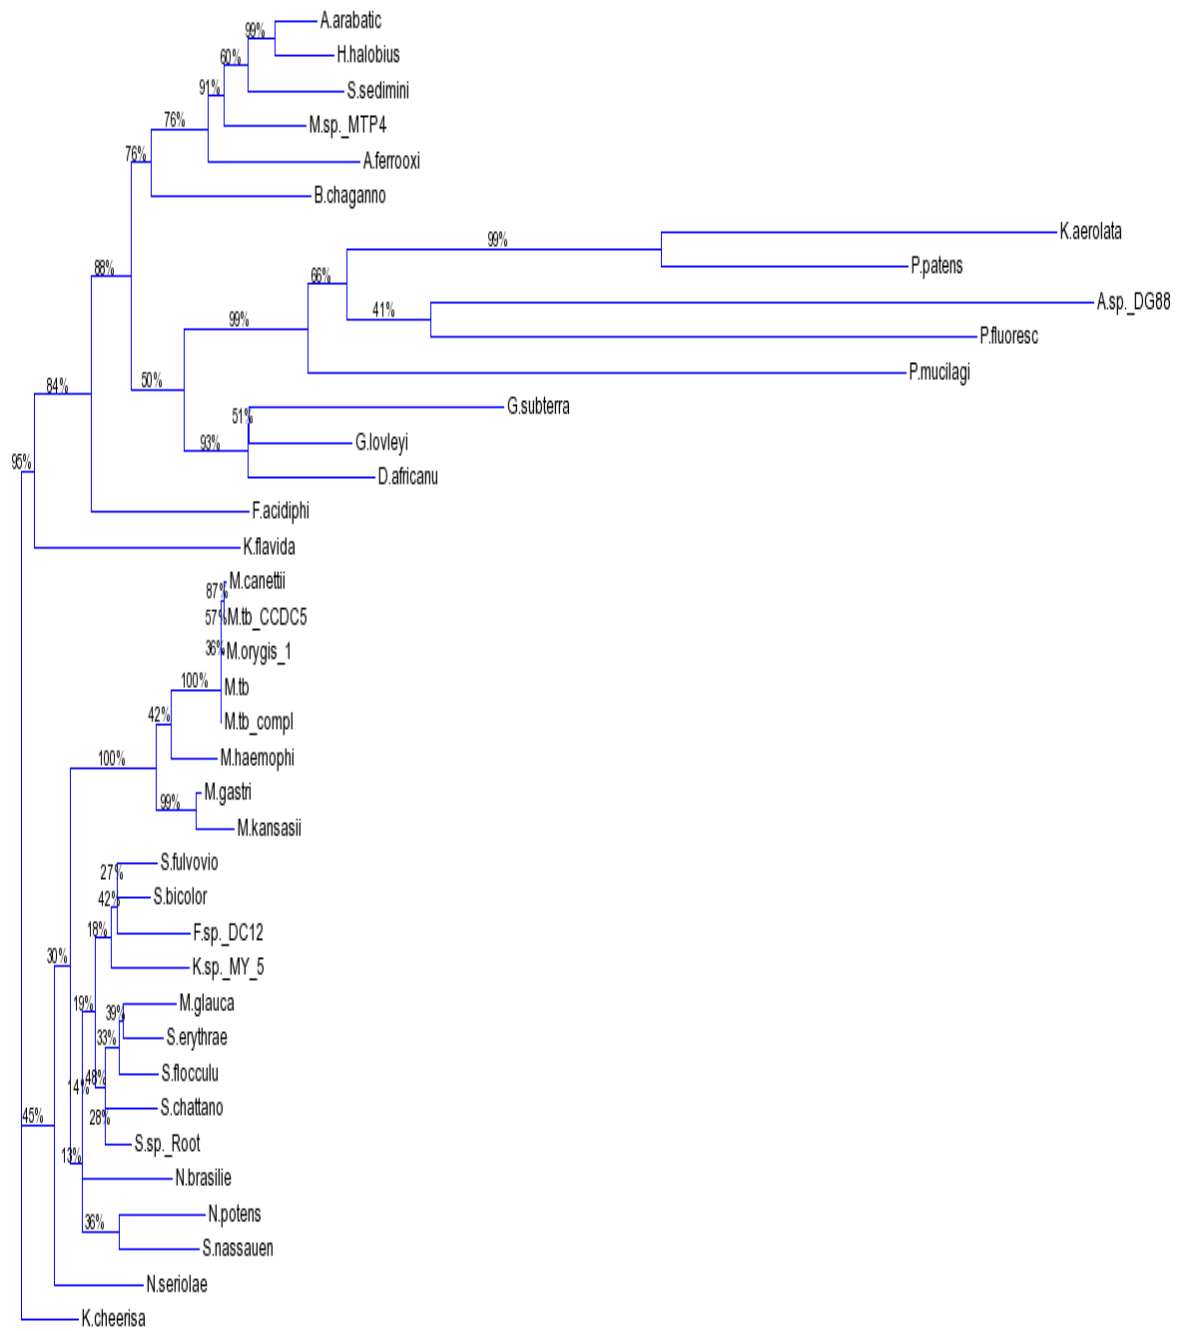

# Rv1988

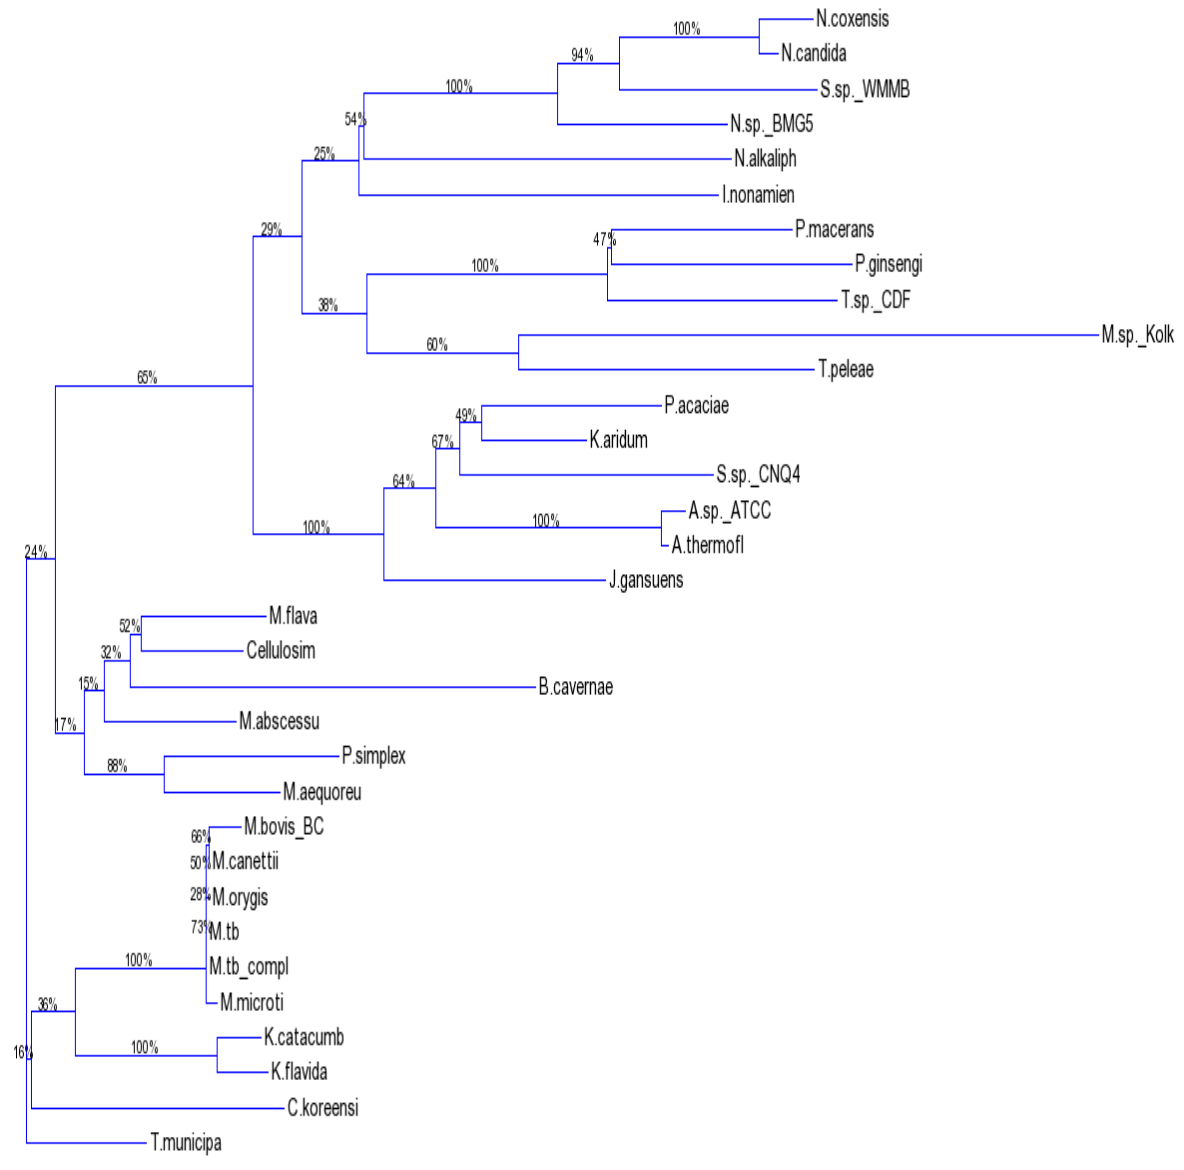

# Rv2492

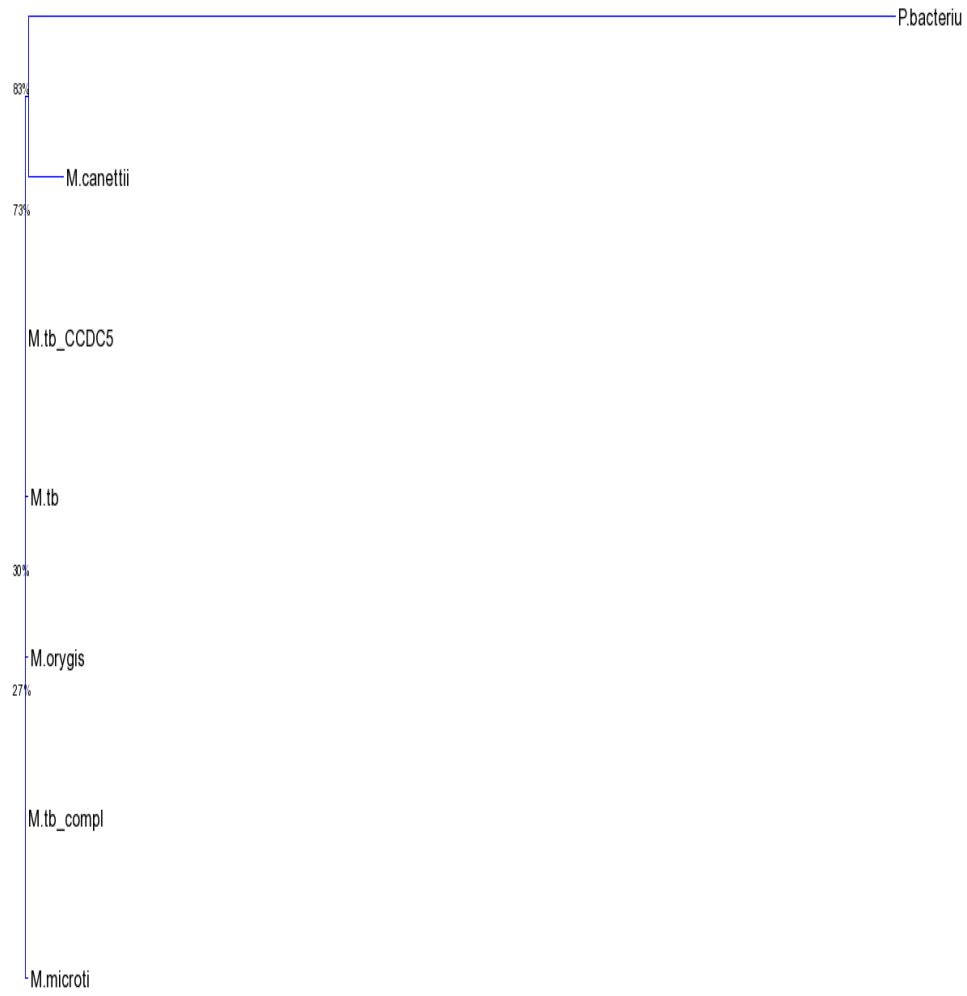

# Rv3322c

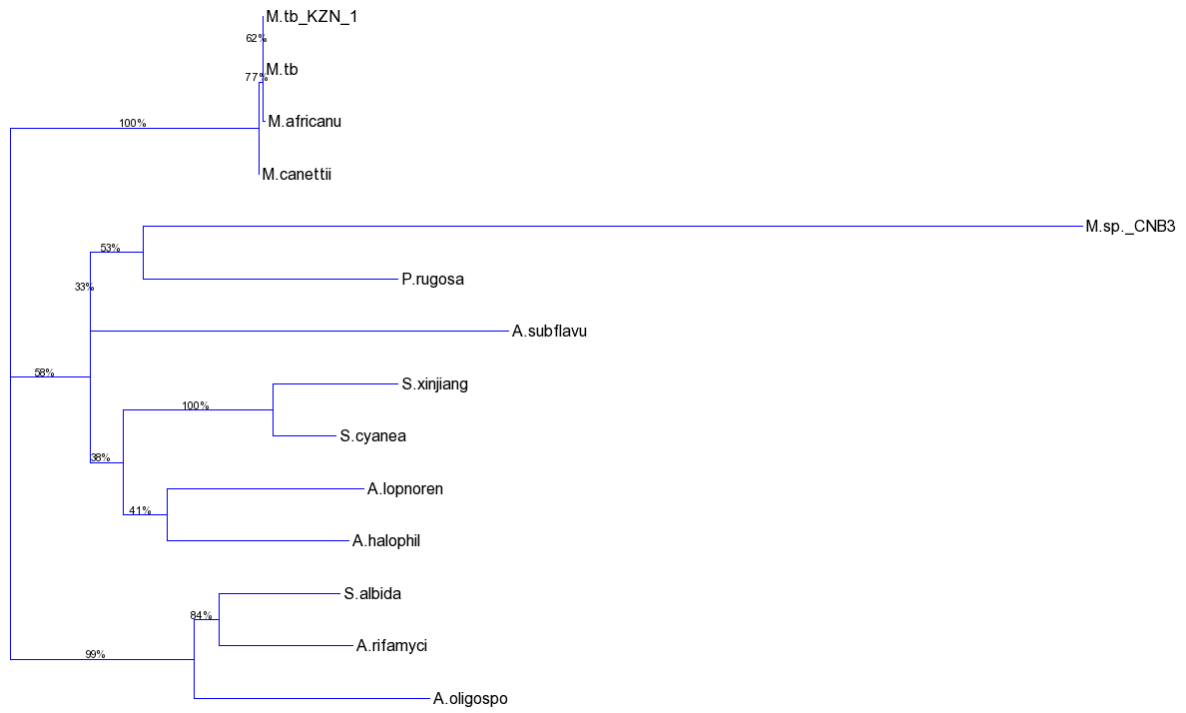

Supplement: c5mb00810g3.pdf [file c5mb00810g3.pdf]
