# Supplementary material for: Analyses of methyltransferases across the pathogenicity spectrum of different mycobacterial species point to an extremophile connection
Source: Royal Society of Chemistry journal article supplement (doi:10.1039/c5mb00810g), 2016-03-07
Supplement: c5mb00810g1.pdf [file c5mb00810g1.pdf]

**Supplementary Table 1: Different methyltransferases present in *M.tb* proteome**

| Sr. No. | Rv No   | Function of Gene                                                                                     | Name of Gene                                       |
|---------|---------|------------------------------------------------------------------------------------------------------|----------------------------------------------------|
| 1       | Rv0070c | intermediary metabolism and respiration                                                              | serine hydroxymethyltransferase                    |
| 2       | Rv0089  | intermediary metabolism and respiration                                                              | Methyltransferase                                  |
| 3       | Rv0145  | lipid metabolism                                                                                     | S-adenosylmethionine-dependent methyltransferase   |
| 4       | Rv0146  | lipid metabolism                                                                                     | S-adenosylmethionine-dependent methyltransferase   |
| 5       | Rv0187  | intermediary metabolism and respiration                                                              | O-methyltransferase                                |
| 6       | Rv0208c | intermediary metabolism and respiration                                                              | tRNA (guanine-N(7)-)-methyltransferase             |
| 7       | Rv0213c | intermediary metabolism and respiration                                                              | Methyltransferase                                  |
| 8       | Rv0224c | intermediary metabolism and respiration                                                              | Methyltransferase                                  |
| 9       | Rv0281  | lipid metabolism                                                                                     | S-adenosylmethionine-dependent methyltransferase   |
| 10      | Rv0294  | intermediary metabolism and respiration                                                              | trans-aconitate methyltransferase                  |
| 11      | Rv0326  | Unknown                                                                                              | hypothetical protein                               |
| 12      | Rv0329c | Conserved hypotheticals prediction based on GO and InterPro: intermediary metabolism and respiration | hypothetical protein                               |
| 13      | Rv0380c | intermediary metabolism and respiration                                                              | RNA methyltransferase                              |
| 14      | Rv0447c | lipid metabolism                                                                                     | cyclopropane-fatty-acyl-phospholipid synthase UfaA |
| 15      | Rv0469  | lipid metabolism                                                                                     | mycolic acid synthase UmaA                         |
| 16      | Rv0470c | lipid metabolism                                                                                     | cyclopropane mycolic acid synthase                 |
| 17      | Rv0503c | lipid metabolism                                                                                     | cyclopropane mycolic acid synthase                 |
| 18      | Rv0511  | intermediary metabolism and respiration                                                              | uroporphyrin-III C-methyltransferase               |
| 19      | Rv0520  | intermediary metabolism and respiration                                                              | possible methyltransferase                         |
| 20      | Rv0521  | intermediary metabolism and respiration                                                              | possible methyltransferase                         |
| 21      | Rv0558  | intermediary metabolism and respiration                                                              | demethylmenaquinone methyltransferase              |
| 22      | Rv0560c | intermediary metabolism and respiration                                                              | benzoquinone methyltransferase                     |
| 23      | Rv0567  | intermediary metabolism and respiration                                                              | Methyltransferase                                  |
| 24      | Rv0642c | lipid metabolism                                                                                     | hydroxymycolate synthase MmaA4                     |
| 25      | Rv0643c | lipid metabolism                                                                                     | methoxy mycolic acid synthase MmaA3                |
| 26      | Rv0644c | lipid metabolism                                                                                     | cyclopropane mycolic acid synthase MmaA2           |
| 27      | Rv0645c | lipid metabolism                                                                                     | mycolic acid methyltransferase MmaA1               |
| 28      | Rv0724A | conserved hypotheticals                                                                              | conserved hypothetical protein                     |
| 29      | Rv0725c | conserved hypotheticals                                                                              | hypothetical protein                               |
| 30      | Rv0726c | lipid metabolism                                                                                     | S-adenosylmethionine-dependent methyltransferase   |
| 31      | Rv0731c | lipid metabolism                                                                                     | hypothetical protein                               |
| 32      | Rv0764c | intermediary metabolism and respiration                                                              | lanosterol 14- $\alpha$ demethylase                |
| 33      | Rv0811c | conserved hypotheticals                                                                              | hypothetical protein                               |

|    |         |                                         |                                                                                           |
|----|---------|-----------------------------------------|-------------------------------------------------------------------------------------------|
| 34 | Rv0830  | lipid metabolism                        | S-adenosylmethionine-dependent methyltransferase                                          |
| 35 | Rv0881  | intermediary metabolism and respiration | rRNA/rRNA methyltransferase                                                               |
| 36 | Rv0893c | lipid metabolism                        | S-adenosylmethionine-dependent methyltransferase                                          |
| 37 | Rv1003  | Conserved hypotheticals                 | rRNA small subunit methyltransferase I                                                    |
| 38 | Rv1010  | information pathways                    | rRNA small subunit methyltransferase A                                                    |
| 39 | Rv1093  | intermediary metabolism and respiration | serine hydroxymethyltransferase                                                           |
| 40 | Rv1133c | intermediary metabolism and respiration | 5-methyltetrahydropteroyltriglutamate--homocysteine methyltransferase                     |
| 41 | Rv1147  | conserved hypotheticals                 | hypothetical protein                                                                      |
| 42 | Rv1153c | lipid metabolism                        | O-methyltransferase                                                                       |
| 43 | Rv1216c | cell wall and cell processes            | integral membrane protein                                                                 |
| 44 | Rv1220c | intermediary metabolism and respiration | Methyltransferase                                                                         |
| 45 | Rv1300  | intermediary metabolism and respiration | release factor glutamine methyltransferase                                                |
| 46 | Rv1316c | information pathways                    | methylated-DNA--protein-cysteine methyltransferase                                        |
| 47 | Rv1317c | information pathways                    | bifunctional regulatory protein/DNA repair enzyme AlkA/Metal binding domain of Ada        |
| 48 | Rv1377c | intermediary metabolism and respiration | Methyltransferase                                                                         |
| 49 | Rv1403c | intermediary metabolism and respiration | Methyltransferase                                                                         |
| 50 | Rv1405c | intermediary metabolism and respiration | Methyltransferase                                                                         |
| 51 | Rv1407  | information pathways                    | Methyltransferase                                                                         |
| 52 | Rv1498c | intermediary metabolism and respiration | hypothetical protein                                                                      |
| 53 | Rv1506c | Unknown                                 | hypothetical protein                                                                      |
| 54 | Rv1509  | Unknown                                 | hypothetical protein                                                                      |
| 55 | Rv1513  | conserved                               | hypothetical protein, 2-O-methyltransferase_Noel                                          |
| 56 | Rv1515c | conserved hypotheticals                 | hypothetical protein                                                                      |
| 57 | Rv1523  | intermediary metabolism and respiration | Methyltransferase                                                                         |
| 58 | Rv1597  | conserved hypotheticals                 | hypothetical protein                                                                      |
| 59 | Rv1644  | information pathways                    | 23S rRNA methyltransferase TsnR                                                           |
| 60 | Rv1694  | virulence, detoxification, adaptation   | 16S/23S rRNA (cytidine-2'-O)-methyltransferase TlyA                                       |
| 61 | Rv1703c | intermediary metabolism and respiration | Probable catechol-O-methyltransferase                                                     |
| 62 | Rv1729c | lipid metabolism                        | S-adenosylmethionine-dependent methyltransferase                                          |
| 63 | Rv1889c | conserved hypotheticals                 | hypothetical protein                                                                      |
| 64 | Rv1896c | conserved hypotheticals                 | S-adenosyl-L-methionine-dependent methyltransferase                                       |
| 65 | Rv1978  | conserved hypotheticals                 | hypothetical protein                                                                      |
| 66 | Rv1988  | intermediary metabolism and respiration | 23S rRNA methyltransferase                                                                |
| 67 | Rv2003c | conserved hypotheticals                 | hypothetical protein                                                                      |
| 68 | Rv2066  | intermediary metabolism and respiration | bifunctional S-adenosyl-L-methionine-precorrin-2 methyl transferase/precorrin-3 methylase |
| 69 | Rv2067c | conserved hypotheticals                 | hypothetical protein                                                                      |

|     |                 |                                          |                                                                    |
|-----|-----------------|------------------------------------------|--------------------------------------------------------------------|
| 70  | Rv2071c         | intermediary metabolism and respiration  | Precorrin-3 methylase CobM                                         |
| 71  | Rv2072c         | intermediary metabolism and respiration  | precorrin-6Y C(5,15)-methyltransferase                             |
| 72  | Rv2118c         | intermediary metabolism and respiration  | tRNA (adenine(58)-N(1))-methyltransferase                          |
| 73  | Rv2124c         | intermediary metabolism and respiration  | methionine synthase                                                |
| 74  | Rv2165c         | conserved hypotheticals                  | rRNA small subunit methyltransferase H                             |
| 75  | Rv2211c         | intermediary metabolism and respiration  | Aminomethyltransferase                                             |
| 76  | Rv2225          | intermediary metabolism and respiration  | 3-methyl-2-oxobutanoate hydroxymethyltransferase                   |
| 77  | Rv2258c         | regulatory proteins                      | transcriptional regulator                                          |
| 78  | Rv2372c         | conserved hypotheticals                  | rRNA small subunit methyltransferase E                             |
| 79  | Rv2423          | conserved hypotheticals                  | hypothetical protein Rv2423                                        |
| 80  | Rv2437          | cell wall and cell processes             | putative protein-S-isoprenylcysteine methyltransferase             |
| 81  | Rv2458          | intermediary metabolism and respiration  | homocysteine S-methyltransferase MmuM                              |
| 82  | Rv2492          | conserved hypotheticals                  | hypothetical protein Rv2492                                        |
| 83  | Rv2601          | intermediary metabolism and respirations | spermidine synthase                                                |
| 84  | Rv2622          | intermediary metabolism and respirations | Methyltransferase                                                  |
| 85  | Rv2675c         | conserved hypotheticals                  | hypothetical protein                                               |
| 86  | Rv2689c         | conserved hypotheticals                  | hypothetical protein                                               |
| 87  | Rv2751          | conserved hypotheticals                  | hypothetical protein                                               |
| 88  | Rv2756c         | information pathways                     | type I restriction/modification system DNA methylase HsdM          |
| 89  | Rv2764c         | intermediary metabolism and respirations | thymidylate synthase ThyA                                          |
| 90  | Rv2880c/Rv2879c | conserved hypotheticals                  | Probable dual-specificity RNA methyltransferase                    |
| 91  | Rv2906c         | information pathways                     | tRNA (guanine-N1)-methyltransferase                                |
| 92  | Rv2952          | intermediary metabolism and respirations | phthiotriol/phenolphthiotriol dimycocerosates methyltransferase    |
| 93  | Rv2954c         | conserved hypotheticals                  | hypothetical protein                                               |
| 94  | Rv2955c         | conserved hypotheticals                  | hypothetical protein                                               |
| 95  | Rv2956          | conserved hypotheticals                  | hypothetical protein                                               |
| 96  | Rv2959c         | intermediary metabolism and respirations | rhamnosyl O-methyltransferase                                      |
| 97  | Rv2966c         | intermediary metabolism and respirations | Methyltransferase                                                  |
| 98  | Rv2990c         | conserved hypotheticals                  | hypothetical protein                                               |
| 99  | Rv3015c         | conserved hypotheticals                  | hypothetical protein                                               |
| 100 | Rv3024c         | information pathways                     | t-RNA (5-methylaminomethyl-2-thiouridylate)-methyltransferase TrmU |
| 101 | Rv3030          | conserved hypotheticals                  | S-adenosylmethionine-dependent methyltransferase                   |
| 102 | Rv3037c         | conserved hypotheticals                  | S-adenosylmethionine-dependent methyltransferase                   |
| 103 | Rv3038c         | conserved hypotheticals                  | hypothetical protein                                               |
| 104 | Rv3120          | conserved hypotheticals                  | hypothetical protein                                               |
| 105 | Rv3204          | information pathways                     | DNA-methyltransferase                                              |
| 106 | Rv3238c         | cell wall and cell processes             | integral membrane protein                                          |
| 107 | Rv3263          | information pathways                     | DNA methylase                                                      |

|     |         |                                          |                                                     |
|-----|---------|------------------------------------------|-----------------------------------------------------|
| 108 | Rv3322c | intermediary metabolism and respirations | Methyltransferase                                   |
| 109 | Rv3342  | intermediary metabolism and respirations | Methyltransferase                                   |
| 110 | Rv3366  | information pathways                     | tRNA/rRNA methylase SpoU                            |
| 111 | Rv3392c | lipid metabolism                         | cyclopropane mycolic acid synthase CmaA             |
| 112 | Rv3399  | lipid metabolism                         | S-adenosylmethionine-dependent methyltransferase    |
| 113 | Rv3579c | intermediary metabolism and respirations | tRNA/rRNA methyltransferase                         |
| 114 | Rv3699  | conserved hypotheticals                  | Hypothetical protein                                |
| 115 | Rv3701c | conserved hypotheticals                  | histidine-specific methyltransferase EtgD           |
| 116 | Rv3720  | lipid metabolism                         | mycolic acid cyclopropane synthetase                |
| 117 | Rv3729  | intermediary metabolism and respirations | putative transferase                                |
| 118 | Rv3767c | lipid metabolism                         | S-adenosylmethionine-dependent methyltransferase    |
| 119 | Rv3787c | conserved hypotheticals                  | S-adenosyl-L-methionine-dependent methyltransferase |
| 120 | Rv3832c | conserved hypotheticals                  | hypothetical protein                                |
| 121 | Rv3919c | cell wall and cell processes             | GibD                                                |
