# Supplementary material for: Analyses of methyltransferases across the pathogenicity spectrum of different mycobacterial species point to an extremophile connection
Source: Royal Society of Chemistry journal article supplement (doi:10.1039/c5mb00810g), 2016-03-07
Supplement: c5mb00810g4.pdf [file c5mb00810g4.pdf]

**Supplementary Table 4: Physico-chemical analysis of distinct *M.tb* Methyltransferases**

| <b><i>M.tb</i> H<sub>37</sub>Rv Distinct MTases</b> | <b>Aliphatic index</b> | <b>GRAVY</b> | <b>Instability Index</b> |
|-----------------------------------------------------|------------------------|--------------|--------------------------|
| Rv0326                                              | 89.14                  | 0.014        | 45.91                    |
| Rv0329c                                             | 97.74                  | 0.164        | 26.49                    |
| Rv0725c                                             | 81.56                  | -0.051       | 32.55                    |
| Rv1498c                                             | 77.96                  | -0.27        | 38.46                    |
| Rv1509                                              | 91.3                   | -0.015       | 45.94                    |
| Rv1515c                                             | 85.13                  | -0.271       | 45.71                    |
| Rv1988                                              | 104.08                 | 0.087        | 48.31                    |
| Rv2003                                              | 85.93                  | -0.107       | 53.17                    |
| Rv2492                                              | 88.52                  | -0.284       | 38.92                    |
| Rv2954c                                             | 86.97                  | -0.26        | 43.29                    |
| Rv2955c                                             | 93.99                  | -0.156       | 41.76                    |
| Rv2990c                                             | 96.57                  | -0.161       | 41.30                    |
| Rv3120                                              | 90.8                   | -0.054       | 60.66                    |
| Rv3322c                                             | 91.96                  | 0            | 54.19                    |
| Rv3729                                              | 93.32                  | -0.048       | 36.63                    |
